# Supplementary material for: Long-Read Sequencing to Unravel Complex Structural Variants of CEP78 Leading to Cone-Rod Dystrophy and Hearing Loss
Source: PubMed Central journal article supplement (PMC8097100; doi:10.3389/fcell.2021.664317), 2021-04-21
Supplement: Data_Sheet_1.pdf [file Data_Sheet_1.pdf]

## SUPPLEMENTARY DATA

### SUPPLEMENTARY CLINICAL DATA

**Supplementary Clinical Data 1. Representative ophthalmological pictures of F2, II:1 carrying the *CEP78-PSAT1* deletion combined with *CEP78* c.1209-2A>C. **A.** Fundus image of the right eye at age 49 showing generalized retinal dystrophy with attenuated retinal vessels. **B.** Fundus autofluorescence of the right eye at age 49 showing a midperipheral mottled appearance. **C.** OCT image of the left eye at age 49 showing attenuation of outer retinal layers.**

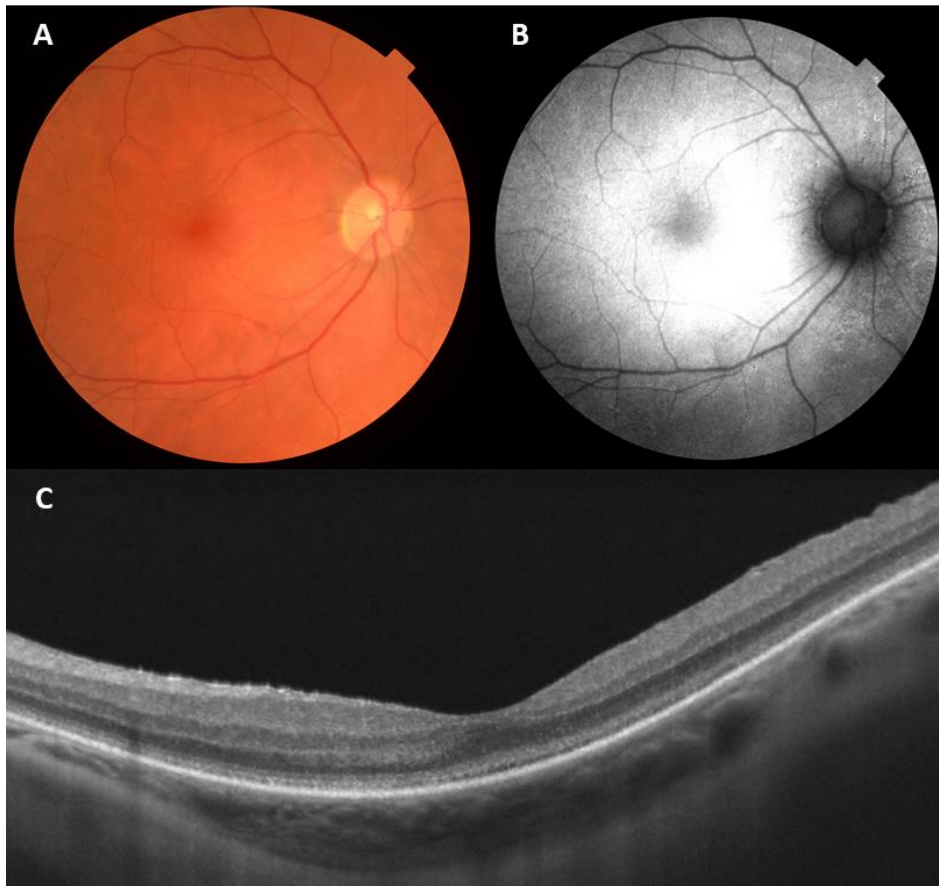

**Supplementary Clinical Data 2. Representative ophthalmological imaging of F4, II:1 homozygous for c.1208+2T>A (p.?) in *CEP78* and his extended family pedigree. **A.** Fundus image of the left eye at age 57 showing narrow blood vessels and greyish discoloration. **B.** OCT scan showing attenuation of the outer retina. **C.** Fundus autofluorescence of the left eye showing mottled hypoautofluorescence around the large vascular arcades and a perifoveal hyperfluorescent ring. **D.** ERG with extinguished responses of cones and rods. **E.** Extended pedigree of F4.**

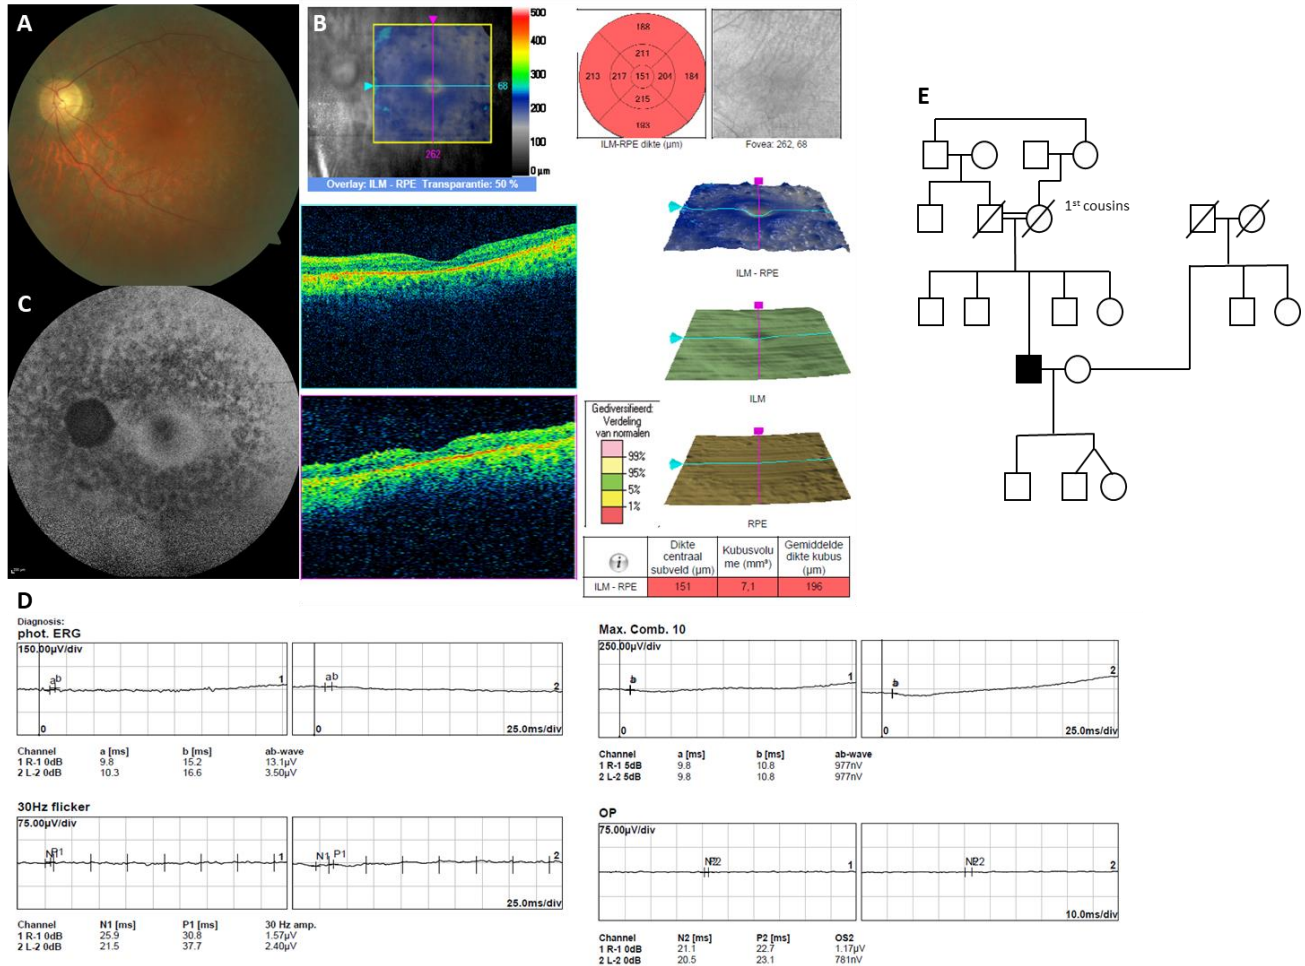

## SUPPLEMENTARY FIGURES

**Supplementary Figure 1. Junction deletion product from F1.** Long-range PCR confirmed the presence of a junction product of the expected size (~12 kb) (left lane). Primers used: Start3-fw (TTTGCCTTTCTGTACAACC) and Intron5-2-rv (GACACCACAAGACACACAGAAA). Ladder: 1 kb Plus DNA (Thermo Fisher) on 1% agarose gel (right lane).

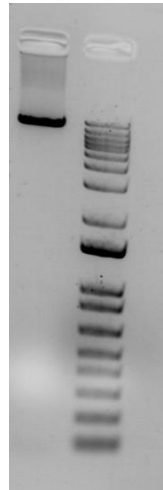

**Supplementary Figure 2. *CEP78* mRNA expression analysis on control and patient-derived materials (F1-F3).** **A.** RNA expression profile in the affected individual F1, II:1 and in three controls. **B.** RNA expression profile in the affected individual F2, II:1 and in two controls. **C.** RNA expression profile in the affected individual F3, II:1, her parents (F3, I:1 and I:2) and three controls. Quantitative RT-PCR (qRT-PCR) was performed on cDNA synthesized from total RNA from short-term cultured lymphocytes (F1 and F3) or fibroblasts (F2). Data were analyzed with qbase+ and normalized to the *YWHAZ* and *HMBS* or *SDHA* genes. In F1, II:1 and F2, II:1 loss of *CEP78* expression is observed, compared to controls. In F3, II:1 *CEP78* expression is strongly reduced compare to her parents (F3, I:1 and I:2) and controls.

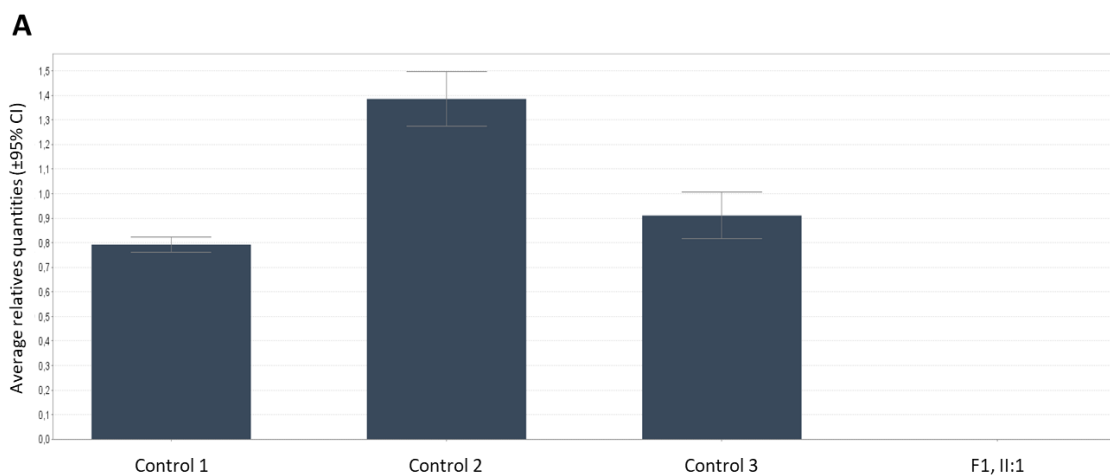

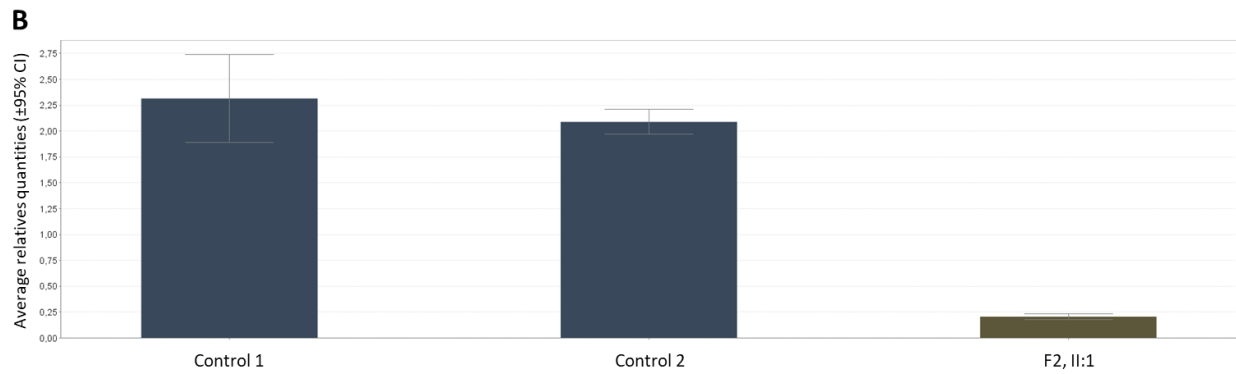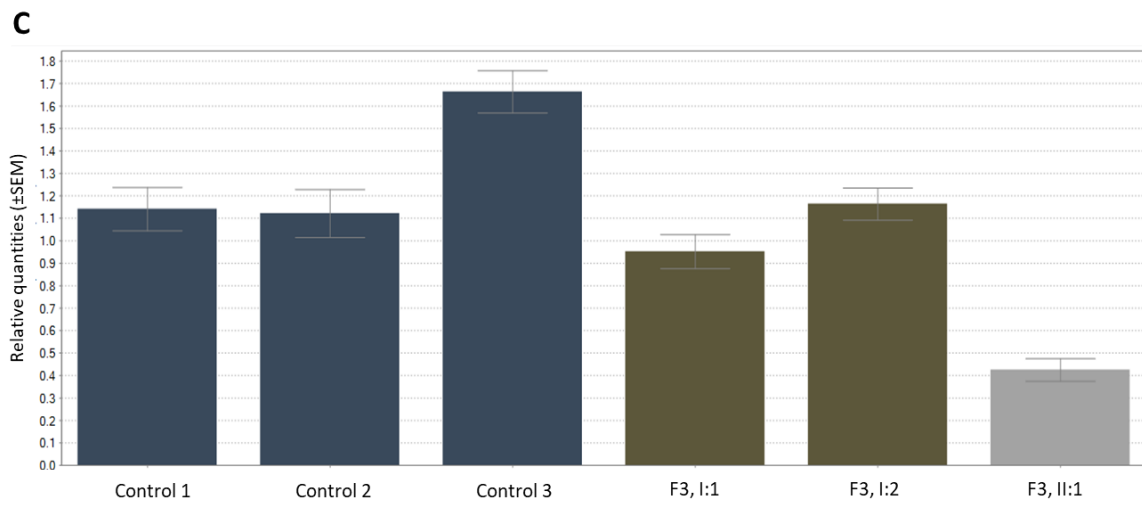

**Supplementary Figure 3. Segregation analysis in F2 and RT-PCR in F2, II:1.** **A.** Segregation analysis suggested a heterozygous genomic deletion in the *CEP78* region for F2, II:1, in compound heterozygosity with the splice variant c.1209-2A>C. Primers used: *CEP78*-ex10-F: CCAGGCCCTTATTTGGAAGT and *CEP78*-ex10-R: AGGCCTCCATTGTGTGACAT. **B.** RT-PCR is showing skipping of exon 10 due to the splicing variant. Primers used: *CEP78*-c.444F-RT-PCR (ACCTGTCTCTTGCAAATTGTCC) and *CEP78*-c.1300R-RT-PCR (AGGATGAAGGACTCTCTACTGTC). Ran on 2% agarose gel. **C.** Direct sequencing of the amplified *CEP78* cDNA from the proband confirmed exon 10 skipping.

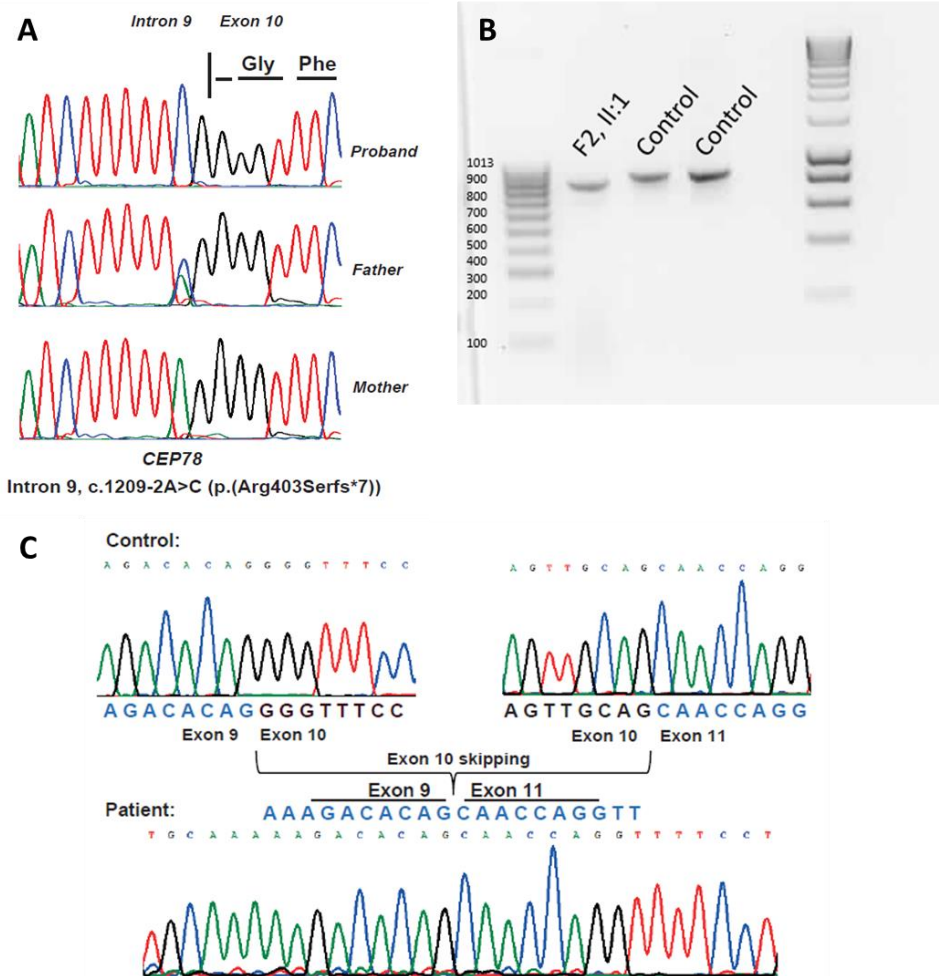

**Supplementary Figure 4. Alamut Visual splicing predictions.** **A.** Splicing prediction for *CEP78* c.1209-2A>C (F2, II:1), predicting complete loss of the canonical acceptor splice site of intron 9. **B.** Splicing predictions for *CEP78* c.1208+2T>A (F4, II:1), predicting complete loss of the canonical donor splice site of intron 9. Predictions from Alamut Visual v.2.11.0.

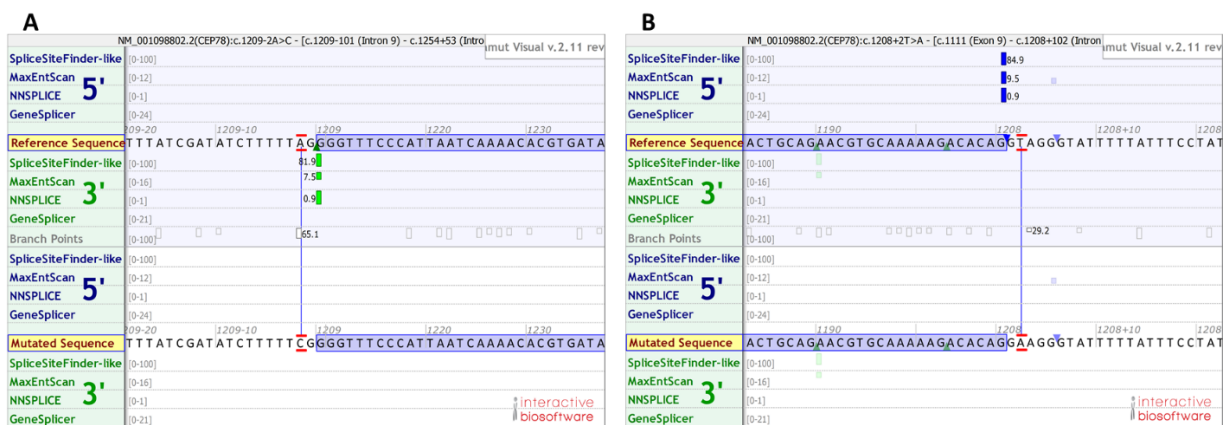

**Supplementary Figure 5. Breakpoint evaluation of the deletion spanning *CEP78-PSAT1* in F2, II:1.** Comparison of the sequences at the breakpoint junctions shows microhomology, supporting microhomology mediated break-induced replication as the underlying mechanism. In blue-grey the junction point is highlighted, in bold the breakpoint as suggested by LRS.

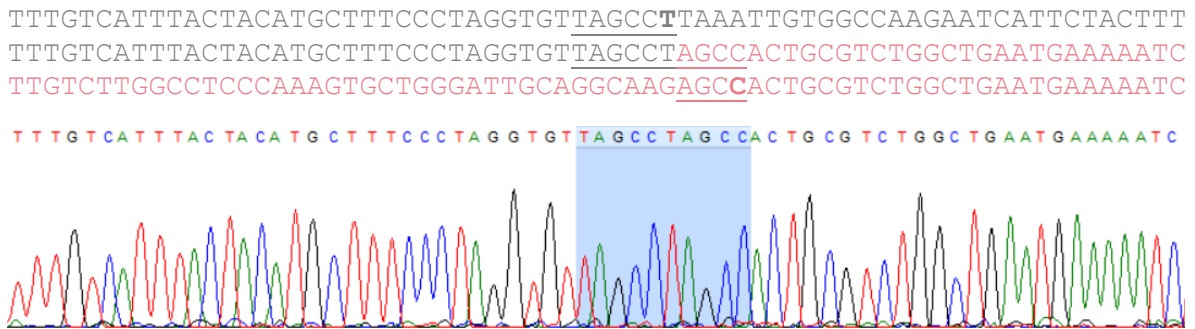

**Supplementary Figure 6. Segregation analysis in F3.** Segregation analysis has been performed combining long-range PCR (as performed for F1) and Sanger sequencing (*data not shown*). In the proband of F3 the deletion is paternal while the c.1449dup variant is maternal.

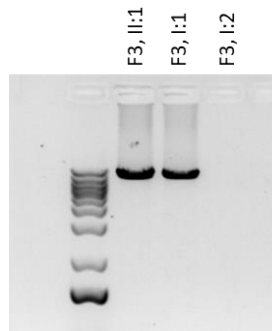

**Supplementary Figure 7. *CEP78* transcriptional landscape. A.** Median *CEP78* gene-level expression in transcripts per million (TPM) across human tissues (GTEx) and retina. **B.** Average *CEP78* retinal expression quantified at transcript level: *CEP78*-215 (ENST00000643273.2) is the most highly expressed isoform. **C.** Dot plot showing predominant expression of *CEP78* in cones (human): individual dots are colored and sized to visualize both the proportion of cells in each population expressing a given gene (dot diameter size) and the average expression level of that gene (dot color intensity) in the detected cells.

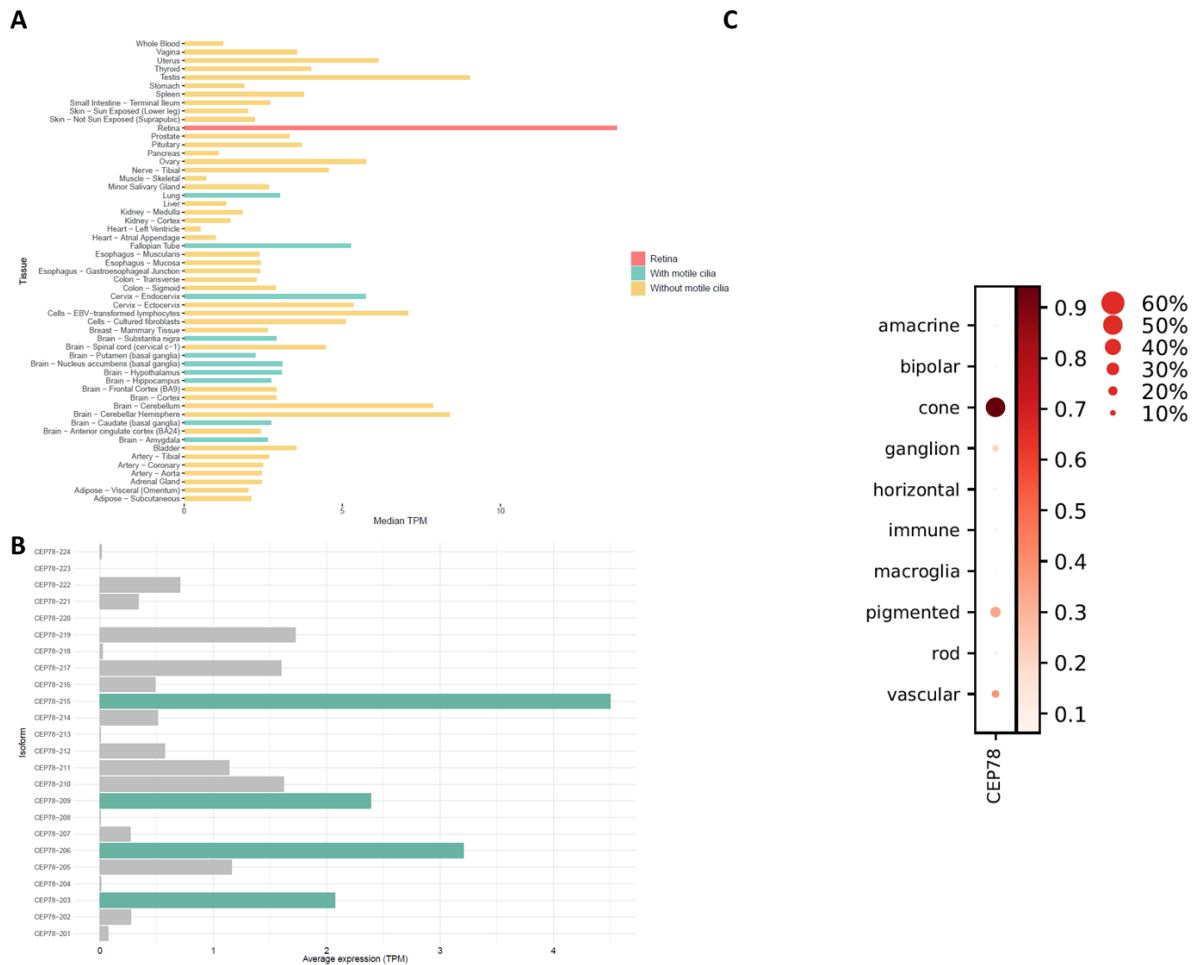

**Supplementary Figure 8. *CEP78* expression in human and murine transcriptional datasets A.** (top) UMAP plot of 11,332 P1 murine cochlear cells coloured based on the 21 transcriptionally distinct clusters (0-20) and visualization of *Cep78* expression; (bottom) visualization of feature expression on UMAP plot of marker genes for inner/outer hair cell population: *Slc7a14*, *Dnm3*, *Pvalb*. **B.** (top) Bulk *CEP78* expression in murine inner/outer hair cells and (bottom) human cochlea/components of the vestibular labyrinth (sacculle, ampulla, utricle).

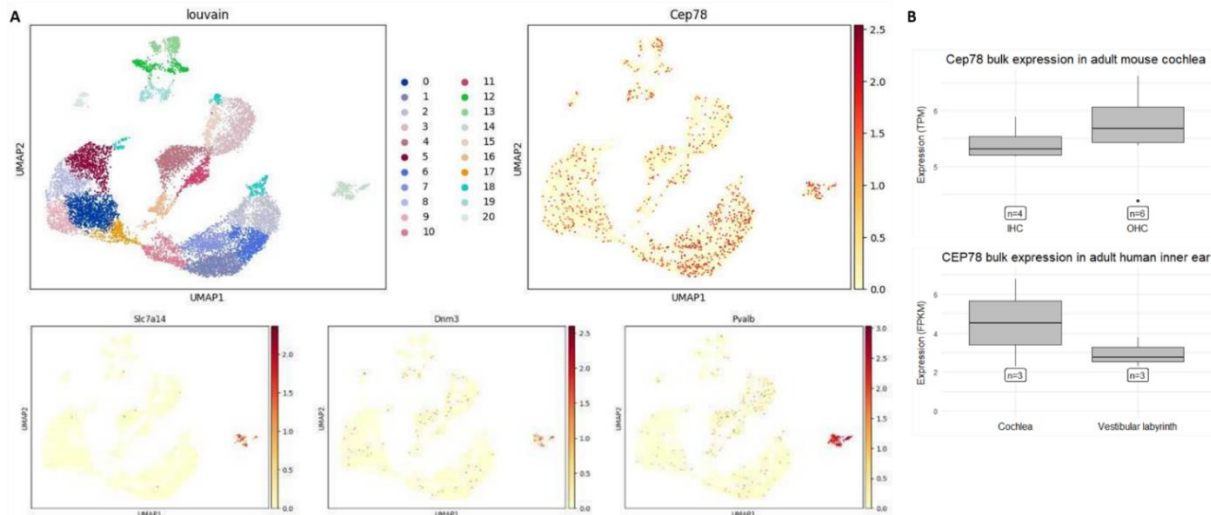

**Supplementary Figure 9. Correlogram of *CEP78* expression and selected ciliary genes in human retina.** The expression patterns of *CEP78*, *SCLT1*, *MKS1*, *CEP57*, *CEP76*, *CEP135*, *CEP152*, *CEP63*, *CEP164*, *OFD1*, *CEP250* in human adult bulk retinal transcriptional datasets were assessed for coordinated correlation, providing insight into potential regulatory interactions. As shown in the correlogram, *CEP78* expression was found to be anti-correlated with *CEP250* ( $\rho=-0.53$ ,  $p=0.0007$ ) and to be correlated with *SCLT1* ( $\rho=0.63$ ,  $p<0.001$ ) and other centrosomal genes.

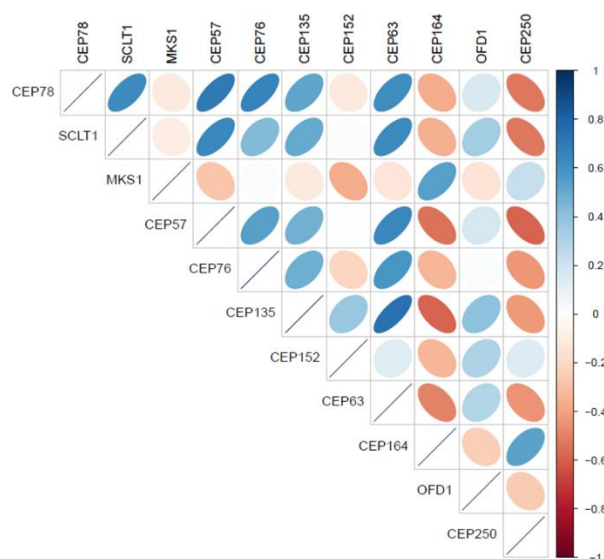



**Supplementary Figure 10. Overview of identified *CEP78* SVs in this study.** Top panel: Overview of the two *CEP78* SVs identified in this study: the 235-kb deletion found in F2, II:1 (chr9:78096930-78331887) and the recurrent complex SV found in F1 and F3. Deletions are depicted in red, the inversion in blue. Numbering of the breakpoints of the 235-kb deletion is shown here (1 and 2). Lower panel: Breakpoint numbering of the recurrent complex SV is shown here (orange box). A close-up is shown for the complex SV (red: deleted regions, blue: inverted region). Breakpoint and junction numbering used for an in-depth analysis of these regions (see Supplementary Table 6) are shown (BP: 1-2-3-4, J1 and J2). Of note, LINE repeats intersect all breakpoints of the complex SV. Abbreviations: D1: deletion 1; D2: deletion 2; I and INV: inversion; SINE: short interspersed nuclear element; LINE: long interspersed nuclear elements; LTR: long terminal repeat; DNA: deoxyribonucleic acid and RNA: ribonucleic acid.

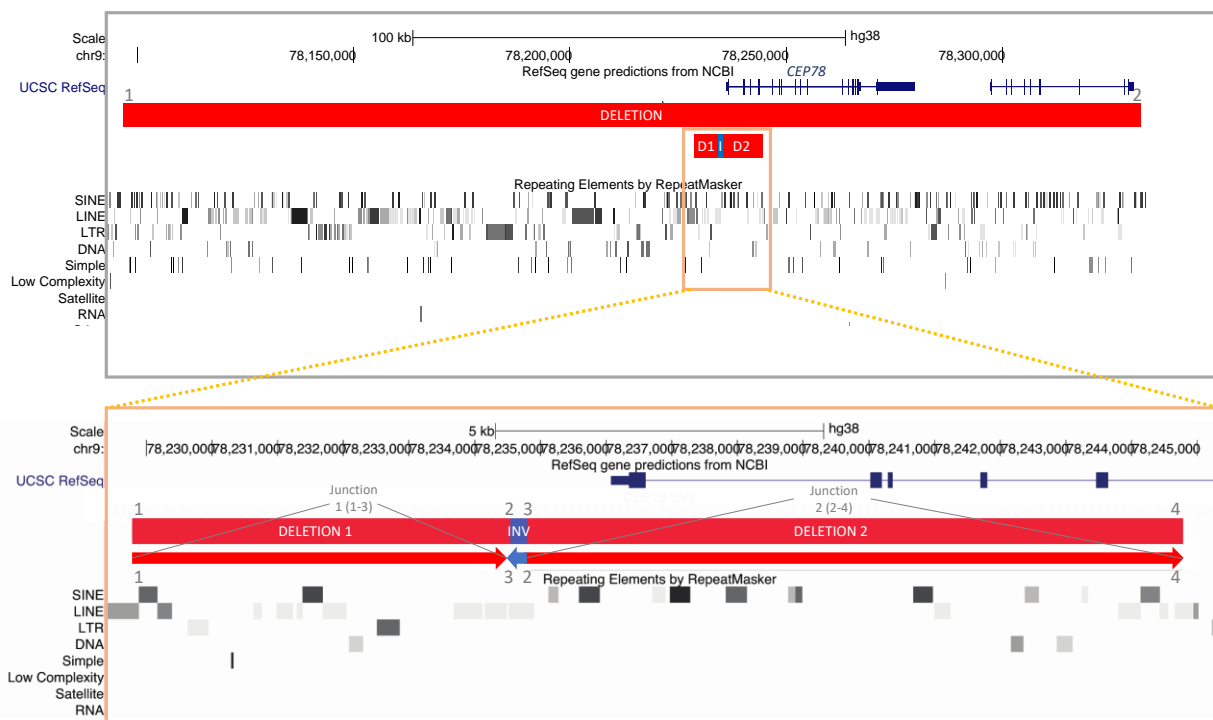

## SUPPLEMENTARY TABLES

**Supplementary Table 1. PCR primers for CNV analysis or expression analysis on patient-derived material and controls.** *GNAQ* and *PSAT1* are the flanking genes of *CEP78*. Primers were designed with Primer3Plus ([www.bioinformatics.nl/primer3plus](http://www.bioinformatics.nl/primer3plus)).

| Target                     | Forward primer (5'-3')    | Reverse primer (5'-3')   |
|----------------------------|---------------------------|--------------------------|
| <b>CNV screening</b>       |                           |                          |
| <i>GNAQ</i>                | CCAGAGTCATTCTCCAAAGTG     | GCGGGAGGGTGTGTGT         |
| <i>CEP78</i> start1        | GGAGTTAGCCAACATCATCG      | TCCTGGCAAATTGAAGAGTG     |
| <i>CEP78</i> start3        | TTTGCGCTTTCTGTACAACC      | TGAATAATGGTGAGGGACGA     |
| Exon 1                     | CTCCCACTACGAGTACCT        | GATCTTGAGGGTGCTCAG       |
| Exon 2                     | CCTGCGATAAGATACAAAGATG    | CAGGTTCTTTAGCACACTTG     |
| Exon 3                     | CCCTCATTAAGGGATTGAATA     | CACTTTCTAAACCTCCATCTC    |
| Exon 4                     | AGTTATTTGTCAAGGTATAAAGAGC | ATCTTGCCATGTGATCTG       |
| Exon 5                     | GAAACCTGGGCTGAGAG         | GGTCACCAATAAGTGTGTTG     |
| Exon 6                     | TTTGCTAGAGGCCCTTGA        | TGTAGCGACATACCAATGAGT    |
| Exon 7                     | AGATCATTCTATGATGAAAGCAG   | AAACATGATATACCTCTGATTTGG |
| Exon 8                     | TTTAGTACCAGTGGATAACTTCT   | CCTTTGTGACCACTTCTCT      |
| Exon 9                     | CCTGTAAGTAGTGGCAGAAA      | CACGGCAAGAAACCAGA        |
| Exon 10                    | GCAAGTGTATTACCTAGTGTT     | GGTAACTACGTACCTGCAA      |
| Exon 11                    | CCTGTGACTGTGACAGTAGAGA    | TGTACCTGTAATGCTTCTTGTCT  |
| Exon 12                    | ACTGGAGGAGTGCCTAAA        | TATTTACCTCACTGACTCGTTTA  |
| Exon 13                    | AATTTCTTTTGTCTGAAGCC      | TCTCAATGCTGCCAAA         |
| Exon 14                    | GCTGGGATAGATCAGTCAG       | TAGGGCATTCTGCTTCG        |
| Exon 16                    | TTTCTGTCCAGTTTCTAC        | GGTGAAGGAGAACACATTCTA    |
| End <i>CEP78</i>           | GACAAGCAGGGACATGAGATAC    | TTTGCACTACATGTATGGGAGTC  |
| <i>PSAT1_1</i>             | GGGGGTTGAAACAGTAAACG      | AGGAGCTCACATCCCCATT      |
| <i>PSAT1_2</i>             | GACTCGGCGCAGGAAC          | GTGAGTCAGCCAAGGAGGA      |
| <i>CEP78</i> Intron5-1     | GGGAGGGTAATCATGACACA      | ATTCATGCCTGGAAGACTCC     |
| <i>CEP78</i> Intron 5-2    | TGCAGCAAGAGTTTGTAAGG      | GACACCACAAGACACACAGAAA   |
| <b>Expression analysis</b> |                           |                          |
| <i>CEP78</i> expression    | GGCTTAAGACGTATCACACT      | CACTGTTGCAGGTCAAGA       |
| <b>Reference genes</b>     |                           |                          |
| <i>HMBS</i> expression     | GGCAATGCGGCTGCAA          | GGGTACCCACGCGAATCAC      |
| <i>YWHAZ</i> expression    | ACTTTTGGTACATGTGGCTTCAA   | CCGCCAGGACAAACCAGTAT     |
| <i>SDHA</i> expression     | TGGGAACAAGAGGGCATCTG      | CCACCACTGCATCAAATTCATG   |
| <i>GPR15</i> CNVscreening  | GGTCCCTGGTGGCCTTAATT      | TTGCTGGTAATGGGCACACA     |
| <i>ZNF80</i> CNVscreening  | CCCAGTGTGAATCTGCT         | GAAGACCTACAAATGCAAGG     |

**Supplementary Table 2. PCR primers for haplotype analysis.** Primers were designed with Primer3Plus.

| Target     | Forward primer (5'-3')     | Reverse primer (5'-3')      |
|------------|----------------------------|-----------------------------|
| rs524314   | GAGGGGAAGGACCAGACTCT       | TGGCTTAGAACAGTTTTTCATGAATG  |
| rs1029037  | CCACATCCACAACATGGAG        | TGAAAACATGAAATATACAAGAACAGA |
| rs9314838  | TGCTTCAGTTGTAGGGGCAG       | TTAGGGATGGCATCTCCTGG        |
| rs631887   | CAGTTGTTGGATTAGGCAGGC      | TCATCAGGGTGAATACAGAAGTCA    |
| rs10156442 | GAAACCCCTGACCACAGAC        | GGAGGAGATGAAAAGCAAGTT       |
| rs1953019  | CATTTTGTGCACATCCTCAAG      | TGTTCTTTTTGATGCATTTTCTT     |
| rs2026000  | GCAGGAACTTCAGATTTTGGGA     | TCACGTCCCATGTTTCAGTGT       |
| rs4877499  | CCTGGATCCATCAAACCTCA       | GGGGATCTGGTGAGTGAGTG        |
| rs2521904  | TGCTTCAAAGTTAGAACAGCAT     | AACATTTTCTCAAAGAACAGTCTTA   |
| rs7869495  | TTAATGCTGCATGGGTCTTG       | TGAAAGCAGGGAGCATCTG         |
| rs11792810 | GGTCAACTTAATGTAAACTAGCAAAG | GCTGAAGGTGTATGTGTATGTATTT   |
| rs10780305 | AGTTGTTGTGTGCTTGCAGC       | CATTGATAATTTCTCTTATTCTGGT   |
| rs946806   | CAAGTTACAGTAGGCAAGCACG     | CGGTACTGAACAGAGCAGGC        |
| rs7039267  | ACAGTGCAGGGATAGGTATAAAG    | TGGCATGGTATTAACAGTCTAACA    |
| rs7041989  | GGAGGTTTAAGTTTTTAGCACCA    | AGCTCACTGGGTCATGTGAA        |
| rs2988072  | TGCCCGGTTACATGGTAGAT       | TCCTCACTCCACACTGCTG         |
| rs7032321  | TCACCACACCTTTTCAGAAGC      | TCCAACCCTCGATGAGTTATT       |
| rs12335799 | CTGTTATTTCCGTGGGAGA        | TGGGACTAGCTGTATGGCATC       |

**Supplementary Table 3. sWGS output regarding the deletions overlapping the *CEP78* region.** Information is derived from ViVar (<https://vivar.cmgg.be/>).

|              | <b>F1, II:1</b><br>Homozygous deletion (9) (q21.2)<br>chr9: g.78230001-78245000<br>min 15 kb <--> 20 kb max | <b>F2, II:1</b><br>Deletion (9) (q21.2)<br>chr9: g.78105001-78330000 (hg38)<br>min 225 kb <--> 240 kb max |
|--------------|-------------------------------------------------------------------------------------------------------------|-----------------------------------------------------------------------------------------------------------|
| Gene content | <i>CEP78</i>                                                                                                | <i>CEP78</i> and <i>PSAT1</i>                                                                             |

**Supplementary Table 4. Classification of the *CEP78* variants following ACMG and ACGS guidelines with adaptations.** Information is derived from Alamut Visual (v.2.11.0; NM\_001098802.2) and dbNSFP. *In silico* high impact predictions are indicated in bold. Abbreviations: PM: pathogenic moderate; PP: pathogenic supporting; PS: pathogenic strong; PVS: pathogenic very strong. The strength of some criteria was altered under certain conditions as recommended in literature (Abou Tayoun et al., 2018; Biesecker, Harrison, & ClinGen Sequence Variant Interpretation Working Group, 2018; Ellard et al., 2019, 2020; Nykamp et al., 2017). If available, information from literature and databases is not included in the criteria to avoid double counting of existing classifications that are based on the same set of data (Biesecker et al., 2018).

|                                                                                               | Variant details                                                                                                                                                                        |                                                                                                                                                                                        |                                                                                                                                                                                        |
|-----------------------------------------------------------------------------------------------|----------------------------------------------------------------------------------------------------------------------------------------------------------------------------------------|----------------------------------------------------------------------------------------------------------------------------------------------------------------------------------------|----------------------------------------------------------------------------------------------------------------------------------------------------------------------------------------|
|                                                                                               | F2, II:1                                                                                                                                                                               | F3, II:1                                                                                                                                                                               | F4, II:1                                                                                                                                                                               |
| gDNA Chr9 (GRCh38)                                                                            | g.78253230A>C                                                                                                                                                                          | g.78262972dup                                                                                                                                                                          | g.78252045T>A                                                                                                                                                                          |
| cDNA                                                                                          | c.1209-2A>C                                                                                                                                                                            | c.1449dup                                                                                                                                                                              | c.1208+2T>A                                                                                                                                                                            |
| Protein                                                                                       | p.?                                                                                                                                                                                    | p.(Arg484Thrfs*4)                                                                                                                                                                      | p.?                                                                                                                                                                                    |
| Location                                                                                      | Acceptor splice site of intron 9                                                                                                                                                       | Duplication (1 bp) in exon 12                                                                                                                                                          | Donor splice site of intron 9                                                                                                                                                          |
| dbSNP                                                                                         | rs778035330                                                                                                                                                                            |                                                                                                                                                                                        |                                                                                                                                                                                        |
| gnomAD v3.1                                                                                   | ALL: 0.002628 % - NFE: 0.001470%                                                                                                                                                       |                                                                                                                                                                                        |                                                                                                                                                                                        |
| CADD: scaled C-score                                                                          | <b>25.6</b>                                                                                                                                                                            |                                                                                                                                                                                        | <b>23.7</b>                                                                                                                                                                            |
| Mutation Taster                                                                               | <b>1</b>                                                                                                                                                                               |                                                                                                                                                                                        | <b>1</b>                                                                                                                                                                               |
| DANN                                                                                          | 0.8316                                                                                                                                                                                 |                                                                                                                                                                                        | <b>0.99</b>                                                                                                                                                                            |
| FATHMM-MKL                                                                                    | <b>0.9198</b>                                                                                                                                                                          |                                                                                                                                                                                        | <b>0.968</b>                                                                                                                                                                           |
| Eigen raw                                                                                     | <b>0.7215</b>                                                                                                                                                                          |                                                                                                                                                                                        | 0.88                                                                                                                                                                                   |
| GERP++                                                                                        | 5.01                                                                                                                                                                                   |                                                                                                                                                                                        | 5.25                                                                                                                                                                                   |
| RF                                                                                            | 0.748                                                                                                                                                                                  |                                                                                                                                                                                        | <b>0.946</b>                                                                                                                                                                           |
| FitCons                                                                                       | 0.2629                                                                                                                                                                                 |                                                                                                                                                                                        | 0.16                                                                                                                                                                                   |
| ADA                                                                                           | <b>0.9999</b>                                                                                                                                                                          |                                                                                                                                                                                        | <b>1</b>                                                                                                                                                                               |
| MaxentScan                                                                                    | -0.564 (alt); 7.479 (ref)                                                                                                                                                              |                                                                                                                                                                                        | 1.28 (alt); 9.46 (ref)                                                                                                                                                                 |
| Splicing (SpliceSiteFinder-like, MaxEntScan, NNSPLICE, GeneSplicer and Human Splicing Finder) | Predicted change at acceptor site 2 bps downstream:<br><b>-100.0%</b><br>MaxEnt: -100.0%<br>NNSPLICE: -100.0%<br>SSF: -100.0%<br><b>Skip of exon 10 is very likely</b>                 | No effects                                                                                                                                                                             | Predicted change at donor site 2 bps upstream:<br><b>-100.0%</b><br>MaxEnt: -100.0%<br>NNSPLICE: -100.0%<br>SSF: -100.0%<br><b>Skip of exon 9 is very likely</b>                       |
| <b>Variant classification using ACMG-ACGS guidelines</b>                                      |                                                                                                                                                                                        |                                                                                                                                                                                        |                                                                                                                                                                                        |
| Population data                                                                               | PM2: Absent from controls or at extremely low frequency if recessive in gnomAD                                                                                                         | PM2: Absent from controls or at extremely low frequency if recessive in gnomAD                                                                                                         | PM2: Absent from controls or at extremely low frequency if recessive in gnomAD                                                                                                         |
| Genotype and phenotype of the patient                                                         | PP4_PM: Patient' phenotype or family history is highly specific for a disease with a single genetic etiology - after discussion with the physician                                     | PP4_PM: Patient' phenotype or family history is highly specific for a disease with a single genetic etiology - after discussion with the physician                                     | PP4_PM: Patient' phenotype or family history is highly specific for a disease with a single genetic etiology - after discussion with the physician                                     |
| Literature                                                                                    | ClinVar ID: 836906                                                                                                                                                                     | /                                                                                                                                                                                      | /                                                                                                                                                                                      |
| Computational predictions                                                                     | PVS1: null variant (nonsense, frame shift, canonical +/- 1 or 2 splice sites, initiation codon or multi-exon deletion) in a gene where 'loss of function' is a known disease mechanism | PVS1: null variant (nonsense, frame shift, canonical +/- 1 or 2 splice sites, initiation codon or multi-exon deletion) in a gene where 'loss of function' is a known disease mechanism | PVS1: null variant (nonsense, frame shift, canonical +/- 1 or 2 splice sites, initiation codon or multi-exon deletion) in a gene where 'loss of function' is a known disease mechanism |
| Functional data                                                                               | PS3: Well-established in vitro or in vivo functional studies supportive of a damaging effect on the gene or gene product                                                               | PS3: Well-established in vitro or in vivo functional studies supportive of a damaging effect on the gene or gene product                                                               | NA                                                                                                                                                                                     |
| Segregation data                                                                              | NA                                                                                                                                                                                     | NA                                                                                                                                                                                     | NA                                                                                                                                                                                     |
| Allelic data                                                                                  | PM3_1: For recessive disorders, detected in trans with a pathogenic variant – one observation (this study) of the variant in trans with other pathogenic variants                      | PM3_1: For recessive disorders, detected in trans with a pathogenic variant – one observation (this study) of the variant in trans with other pathogenic variants                      | PM3_PP: For recessive disorders, detected in homozygous state – one observation (this study)                                                                                           |
| <b>Conclusion</b>                                                                             | <b>Pathogenic</b><br><i>ClinGen Bayesian: pathogenic (p = 1)</i>                                                                                                                       | <b>Pathogenic</b><br><i>ClinGen Bayesian: pathogenic (p = 1)</i>                                                                                                                       | <b>Pathogenic</b><br><i>ClinGen Bayesian: pathogenic (p = 0.999)</i>                                                                                                                   |

**Supplementary Table 5. Haplotype analysis of the recurrent *CEP78* deletion.** Segregation analysis of 18 flanking single nucleotide polymorphisms (SNPs) revealed a common haplotype between the individuals carrying the deletion, with a minimal size of 1.9 Mb. The haplotype reconstruction includes SNP evaluation in the *CEP78* patient originally described (Sanchis-Juan et al., 2018) with the complex SV (deletion-inversion-deletion). Abbreviations used: Del1: deletion-inversion-deletion (deletion spanning exon 1-5 *CEP78*); wt: wild type; F: family.

| Marker              | Position (hg38)                    | Av. Het  | Allele UCSC | F1 II:1   | F3 II:1        | F3 I:2 (Mother) | F3 I:1 (Father) | SV Sanchis-Juan et al. |
|---------------------|------------------------------------|----------|-------------|-----------|----------------|-----------------|-----------------|------------------------|
| rs524314            | chr9:75474883                      | 0,481242 | C           | CC        | CA             | AA              | CC              | AA                     |
| rs1029037           | chr9:76039060                      | 0,499490 | A           | CC        | AA             | AA              | CA              | AA                     |
| rs9314838           | chr9:76147202                      | 0,499250 | C           | CC        | CC             | CC              | CC              | TT                     |
| rs631887            | chr9:76497284                      | 0,499990 | C           | CC        | CT             | CT              | CT              | TT                     |
| rs10156442          | chr9:76591810                      | 0,492679 | G           | GG        | GA             | GG              | AA              | AA                     |
| rs1953019           | chr9:77150655                      | 0,499539 | A           | AA        | AC             | CC              | AA              | CC                     |
| rs2026000           | chr9:77720065                      | 0,498673 | A           | <b>GG</b> | <b>GG</b>      | <b>GA</b>       | <b>GG</b>       | <b>GG</b>              |
| rs4877499           | chr9:78233046<br>In deleted region | 0,490231 | G           | NA        | GG             | CG              | CC              | NA                     |
| <b><i>CEP78</i></b> | chr9:78236065-78266994             |          |             | Del1/Del1 | Del1/c.1449dup | c.1449dup/wt    | Del1/wt         | Del1/Del1              |
| rs2521904           | chr9:78713516                      | 0,493247 | G           | <b>GG</b> | <b>GG</b>      | <b>GA</b>       | <b>GG</b>       | <b>GG</b>              |
| rs7869495           | chr9:78929810                      | 0,498982 | G           | <b>GG</b> | <b>GC</b>      | <b>CG</b>       | <b>GC</b>       | <b>GG</b>              |
| rs11792810          | chr9:79255464                      | 0,499609 | C           | <b>TT</b> | <b>TT</b>      | <b>TC</b>       | <b>TT</b>       | <b>TT</b>              |
| rs10780305          | chr9:79363793                      | 0,499977 | G           | <b>GG</b> | <b>GG</b>      | <b>GA</b>       | <b>GG</b>       | <b>GG</b>              |
| rs946806            | chr9:79570457                      | 0,498206 | A           | <b>AA</b> | <b>AG</b>      | <b>GG</b>       | <b>AG</b>       | <b>AA</b>              |
| rs7039267           | chr9:79697131                      | 0,495999 | G           | <b>AA</b> | <b>AG</b>      | <b>GG</b>       | <b>AG</b>       | <b>AA</b>              |
| rs7041989           | chr9:79819028                      | 0,482905 | T           | TT        | TG             | TT              | TG              | TT                     |
| rs2988072           | chr9:79935341                      | 0,483126 | C           | CC        | CC             | CC              | CT              | CC                     |
| rs7032321           | chr9:79984278                      | 0,487684 | A           | AA        | AC             | CC              | AC              | AA                     |
| rs12335799          | chr9:81059207                      | 0,484066 | G           | GG        | CG             | GG              | CG              | GG                     |

**Supplementary Table 6. Bioinformatics analysis of the breakpoints/junctions of the *CEP78* SVs identified in this study.** The presence of microhomology at the breakpoints was assessed using a multiple sequence alignment between the junction fragment and the proximal and distal breakpoint regions, using ClustalO (<https://www.ebi.ac.uk/Tools/msa/clustalo/>; details in Supplementary Table 7). If both breakpoints of an SV overlap with a repetitive element, the consensus sequence was retrieved from UCSC and sequence identity between the repetitive elements was determined using BLAST2

([https://blast.ncbi.nlm.nih.gov/Blast.cgi?PAGE\\_TYPE=BlastSearch&BLAST\\_SPEC=blast2seq&LINK\\_LOC=align2seq](https://blast.ncbi.nlm.nih.gov/Blast.cgi?PAGE_TYPE=BlastSearch&BLAST_SPEC=blast2seq&LINK_LOC=align2seq)). The presence of 40 previously described sequence motifs (Vissers et al., 2009) was investigated using Fuzznuc (<http://www.bioinformatics.nl/cgi-bin/emboss/fuzznuc>). The ability of DNA sequences to form non-B DNA conformations in the breakpoint regions was examined using several tools: GT repeats, forming left handed Z-DNA using non-B DNA motif search tool (nBMST, <https://nonb-abcc.ncifcrf.gov/apps/nBMST/default/>); direct, inverted and mirror repeats, forming slipped hairpin, cruciform and triplex structures, respectively, using nBMST, Quadruplex forming G-Rich Sequences (QGRS) using QGRS Mapper (Kikin, D'Antonio, & Bagga, 2006). All this data was

analyzed together in order to establish the most likely molecular mechanism underlying the SVs. Hg38 nomenclature is used. Breakpoint and junction numbering corresponds to the numbering on Supplementary Figure 10. Bp: base pair; BP: breakpoint; chr: chromosome; J: junction, kb: kilobase.

| SV                                                        | Complex SV (J1)                 | Complex SV (J2)                 | Simple SV               |
|-----------------------------------------------------------|---------------------------------|---------------------------------|-------------------------|
| <b>Deletion/duplication/Inversion</b>                     | Deletion - Inversion - Deletion | Deletion - Inversion - Deletion | Deletion                |
| <b>Start (hg 38) chr9</b>                                 | Deletion 1:78228782             | Deletion 2:78234844             | 78096930                |
| <b>End (hg 38) chr 9</b>                                  | Deletion 1:78234546             | Deletion 2:78244762             | 78331887                |
| <b>Size (kb)</b>                                          | 5.7                             | 9.9                             | 234.9                   |
| <b>Consecutive microhomology (bp) at novel junction</b>   | J1 (1-3): 2                     | J2 (2-4): 3                     | J1 (1-2): 4             |
| <b>Repetitive elements intersecting the 5' breakpoint</b> | BP1: L1MB8                      | BP2: L2c, L1ME3Cz               | BP1: /                  |
| <b>Number of sequence motifs</b>                          | 2                               | 4                               | 0                       |
| <b>Number of non-B DNA conformation prediction motifs</b> | 1                               | -                               | -                       |
| <b>Repetitive elements intersecting the 3' breakpoint</b> | BP3: L1ME3Cz                    | BP4: L1ME3Cz                    | BP2: AluJr4             |
| <b>Number of sequence motifs</b>                          | 4                               | 5                               | 4                       |
| <b>Number of non-B DNA conformation prediction motifs</b> | -                               | -                               | -                       |
| <b>Sequence identity between repetitive elements</b>      | No significant similarity found | No significant similarity found | NA                      |
| <b>Potential molecular mechanism</b>                      | Most likely replicative         | Most likely replicative         | Most likely replicative |

**Supplementary Table 7. Microhomology at the SV junctions.** For both SVs identified in this study, the presence of (consecutive) microhomology at the breakpoints was first assessed using a multiple sequence alignment between the junction fragments and the proximal (orange) and distal (grey) breakpoint regions (150 bp) using Clustal Omega (<https://www.ebi.ac.uk/Tools/msa/clustalo/>). Microhomology at the breakpoints was then indicated in bold text. Breakpoint and junction numbering corresponds to the numbering on Supplementary Figure 10.

|                                      |                                                                                                                                                                                                                                                                                                                                                                                                                                                                                                                                                                                                                                 |
|--------------------------------------|---------------------------------------------------------------------------------------------------------------------------------------------------------------------------------------------------------------------------------------------------------------------------------------------------------------------------------------------------------------------------------------------------------------------------------------------------------------------------------------------------------------------------------------------------------------------------------------------------------------------------------|
| <p><b>Complex SV: Junction 1</b></p> | <p>PROXIMAL TGAGTGGATATTTTCTAGTGTAAACATGTAATTGTGTTAATAATCTCTAAT</p> <p>JUNCTION1 TGAGTGGATATTTTCTAGTGTAAACATGTAATTGTGTTAATAATCTCTAAT</p> <p>DISTAL TGTGCGACATGCTCAAATCTTAATATAGTAAACGCTTGTATATTCATAAA</p><br><p>PROXIMAL TGTATTTCTTTAGTTAATAGTTGCCCTAAAGCTTATGGTATTCATCTTAT</p> <p>JUNCTION1 TGTATTTCTTTAGTTAATAGTTGCCATTCTCTGTTGAAGAGCTTTGTGTAA</p> <p>DISTAL CCAGCTTAATAAATGAAACATTACCATTCTCTGTTGAAGAGCTTTGTGTAA</p><br><p>PROXIMAL CAGAATCTACTTTAGATTTATACTAACTTCATTCCAGTGAAATATAGAAA</p> <p>JUNCTION1 CCACCTTCCCAATCAGACTACTCTCTGACTCTGAGATAACTGCTCTTCT</p> <p>DISTAL CCACCTTCCCAATCAGACTACTCTCTGACTCTGAGATAACTGCTCTTCT</p> |
| <p><b>Complex SV: Junction 2</b></p> | <p>PROXIMAL CATTTATTTCCCTGTTGTTATATGGGAGTTCCATGTAGAAACATACAGT</p> <p>JUNCTION2 CATTTATTTCCCTGTTGTTATATGGGAGTTCCATGTAGAAACATACAGT</p> <p>DISTAL TAAGTTTACATTTACCATGTCATTTTTAGTGACTCTTCAGGGTTCATTA</p><br><p>PROXIMAL AATGTGTCGTTTTTCTGTTGATGGTAATTTAAATGTTTCCAACTTTAC</p> <p>JUNCTION2 AATGTGTCGTTTTTCTGTTGATGGCTTATCCGTTCCATTAGATATATA</p> <p>DISTAL TGTTAATATGCAATAGTACACTGGCTTATCCGTTCCATTAGATATATA</p><br><p>PROXIMAL GATTTCTTTGTTGCTCTATCCATTTTCTTTCTAGTCTCCAGCATCAATT</p> <p>JUNCTION2 AGCTATTTCCAGTTTTTTCATTGTTATAAACAGTACTTTGATACGTGTGT</p> <p>DISTAL AGCTATTTCCAGTTTTTTCATTGTTATAAACAGTACTTTGATACGTGTGT</p>             |
| <p><b>Simple SV: Junction</b></p>    | <p>PROXIMAL TCTGTGTTTCATTGACTAGCTGCCCATTAATCATAGTTTGTCAATTTACT</p> <p>JUNCTION TCTGTGTTTCATTGACTAGCTGCCCATTAATCATAGTTTGTCAATTTACT</p> <p>DISTAL CAGACTAGTCTTGAATTCCTGGCTGCAAGTGATCCTTTTGTCTTGGCCTC</p><br><p>PROXIMAL ACATGCTTTCCTAGGTGTTAGCCTTAAATTGTGGCCAAGAATCATTTCTA</p> <p>JUNCTION ACATGCTTTCCTAGGTGTTAGCCTAGCCACTGCGTCTGGCTGAATGAAA</p> <p>DISTAL CCAAAGTGCTGGGATTGCAGGCAAGAGCCACTGCGTCTGGCTGAATGAAA</p><br><p>PROXIMAL CTTTACCAACTTTAAACTTTGACATCTTTAAGCATTTAAGAAAAATGCAA</p> <p>JUNCTION AATCTTAATGTAGGTCACGTTGGTCTTTCTGAGTACCATAAACTGAGCTT</p> <p>DISTAL AATCTTAATGTAGGTCACGTTGGTCTTTCTGAGTACCATAAACTGAGCTT</p>       |

## SUPPLEMENTARY REFERENCES

- Abou Tayoun, A. N., Pesaran, T., DiStefano, M. T., Oza, A., Rehm, H. L., Biesecker, L. G., & Harrison, S. M. (2018). Recommendations for interpreting the loss of function PVS1 ACMG/AMP variant criterion. *Human Mutation*. <https://doi.org/10.1002/humu.23626>
- Biesecker, L. G., Harrison, S. M., & ClinGen Sequence Variant Interpretation Working Group. (2018). The ACMG/AMP reputable source criteria for the interpretation of sequence variants. *Genetics in Medicine : Official Journal of the American College of Medical Genetics*, 20(12), 1687–1688. <https://doi.org/10.1038/gim.2018.42>
- Ellard, S., Baple, E. L., Berry, I., Forrester, N., Turnbull, C., Owens, M., ... McMullan, D. J. (2019). ACGS Best Practice Guidelines for Variant Classification 2019. *Association for Clinical Genetic Science*.
- Ellard, S., Baple, E. L., Owens, M., Eccles, D. M., Abbs, S., & Zandra, C. (2020). ACGS Best Practice Guidelines for Variant Classification 2020 v4.01. *Association for Clinical Genetic Science*.
- Kikin, O., D'Antonio, L., & Bagga, P. S. (2006). QGRS Mapper: A web-based server for predicting G-quadruplexes in nucleotide sequences. *Nucleic Acids Research*. <https://doi.org/10.1093/nar/gkl253>
- Nykamp, K., Anderson, M., Powers, M., Garcia, J., Herrera, B., Ho, Y. Y., ... Topper, S. (2017). Sherlock: A comprehensive refinement of the ACMG-AMP variant classification criteria. *Genetics in Medicine*. <https://doi.org/10.1038/gim.2017.37>
- Sanchis-Juan, A., Stephens, J., French, C. E., Gleadall, N., Mégy, K., Penkett, C., ... Carss, K. J. (2018). Complex structural variants in Mendelian disorders: identification and breakpoint resolution using short- and long-read genome sequencing. *Genome Medicine*, 10(1), 95. <https://doi.org/10.1186/s13073-018-0606-6>
- Vissers, L. E. L. M., Bhatt, S. S., Janssen, I. M., Xia, Z., Lalani, S. R., Pfundt, R., ... Stankiewicz, P. (2009). Rare pathogenic microdeletions and tandem duplications are microhomology-mediated and stimulated by local genomic architecture. *Human Molecular Genetics*. <https://doi.org/10.1093/hmg/ddp306>
